# Supplementary material for: Exist but Non-Identifiable: Enhancing Future Accountability through Persona Design and AI-Driven Dialogues
Source: Research Square preprint supplement (doi:10.21203/rs.3.rs-6223077/v1), 2025-07-18
Supplement: Supplementary file 1 [file c2951eb5072bb1fef51b8c99.docx]

Appendix 1. Workshop Design

We conducted two rounds of workshops, which were held on 11 January 2024 and 23 March 2024, respectively. Each workshop lasted approximately 3 to 4 hours and was conducted in the following sequence:

1. **Introduction and Consent:** The workshop began with an introduction to the study and the acquisition of consent in accordance with the Institutional Review Board (IRB) guidelines.
2. **Scenario Presentation and Group Allocation:** Researchers presented scenarios related to the plastic agreement (See Appendix 2). A session followed explaining the use of ChatGPT and the persona design method, with time allocated for Q&A. Participants were then divided by a random draw into two groups: Group A and Group B. Both groups participants were encouraged to use ChatGPT if they wanted to.
3. **Activity 1 (Persona Design):** Both groups entered separate rooms and spent time collaboratively designing personas of future generations from the year 2050 (See Appendix 3).
4. **Activity 2 (Role Assignment and Discussion):** Each participant was randomly assigned generation cards provided by the researchers. Participants engaged in a discussion for passing *‘The UN Plastic Treaty’*, role-playing as their assigned generation. For the personas designed in earlier activities, one member from each group was assigned to take on the role directly, while ChatGPT also acted as the persona in each group. Participants inputted the persona profile into ChatGPT and asked it to engage in the discussion as if it were the assigned future generation.
5. **Activity 4 (Presentation and Reflection):** After completing the activities, both groups reconvened to share their designed personas with discussion points through a report presentation session, followed by a Q&A. The workshop concluded with participants reflecting on their experiences.

Appendix 2. Scenario provided during workshops

**Scenario: The UN Plastics Treaty**

[Background Context: As of *January 11(March 23),* ***2050***]

About 30 years ago, in February 2023, the Organisation for Economic Co-operation and Development (OECD) reported that global plastic production had increased from 1.5 million tons in 1950 to 460 million tons in 2019, representing about a 307-fold increase. It was further projected that by 2060, plastic production would reach 1.23 billion tons. However, as of 2050, global plastic production had already surpassed 2 billion tons.

In fact, in 2023, countries around the world initiated efforts to sign the Global Plastic Reduction Treaty (referred to hereafter as the "UN Plastics Treaty") to regulate pollution throughout the entire lifecycle of plastics—from production to disposal. At that time, the South Korean government emphasized the importance of waste management under the concept of a “circular economy” over reducing plastic production and consumption. Furthermore, the Minister of Environment announced an “indefinite extension of the guidance period” for the ban on single-use plastics, opting to rely on voluntary compliance from businesses and self-employed individuals instead of imposing regulations.

**Although the Plastic Agreement aimed to be finalized by 2025 with legally binding commitments from all UN member states,** **negotiations ultimately failed due to conflicting interests, and the agreement was never established.**

[Discussion Topic: As of *January 11(March 23),* ***2024***]

South Korea has been selected to host the Final Intergovernmental Negotiating Committee for the UN Plastics Treaty in 2025. This event, which has been described as “the most significant environmental agreement since the Paris Agreement,” places South Korea in a pivotal role in preparing for the negotiations. Today, as citizen representatives of South Korea’s Preparatory Committee, you are here in order for urging the adoption of the UN Plastics Treaty.

You have been selected to represent various generations in South Korea—from teenagers to individuals in their 70s—as well as people from future generations living 30 years from now.

As representatives of these generations, you are encouraged to refer freely to existing efforts by previous generations through online research and other sources. Based on these insights, you will discuss with a creative and collaborative approach that reflects the unique perspectives of each generation on the direction South Korea should take regarding plastic reduction efforts.

In your discussions on plastic regulations today, please ensure that the following key issues are thoroughly considered.

- ***Inclusivity:*** We strive to actively consider and integrate perspectives from various generations in our decision-making process. This means making efforts to ensure that diverse individuals can contribute to the decisions and that their opinions are reflected. Through this approach, we aim to produce outcomes that embody a wide range of values and experiences.
- ***Respect:*** In discussions and decision-making processes, we endeavor to listen to others’ opinions attentively and value them.
- ***Intergenerational Responsibility:*** We aim to represent not only the present generation but also future generations. This involves taking into account values that may not currently exist or are not immediately visible.
- ***Critical Thinking:*** Our decision-making does not simply accept existing norms or other people’s views without question. Instead, we approach each issue from a new perspective, critically evaluate all ideas based on evidence, and ensure that the decisions we make are consistent, persuasive, and well-justified.
